# Supplementary material for: Structural plasticity of SARS-CoV-2 3CL Mpro active site cavity revealed by room temperature X-ray crystallography
Source: Springer Nature journal article supplement (doi:10.1038/s41467-020-16954-7), 2020-06-24
Supplement: 41467_2020_16954_MOESM1_ESM.pdf [file 41467_2020_16954_MOESM1_ESM.pdf]

## Supplementary Information

### **Structural Plasticity of SARS-CoV-2 3CL M<sup>pro</sup> Active Site Cavity Revealed by Room Temperature X-ray Crystallography**

Daniel W. Kneller,<sup>1</sup> Gwyndalyn Phillips,<sup>1</sup> Hugh M. O'Neill,<sup>1</sup> Robert Jedrzejczak,<sup>2,3</sup> Lucy Stols,<sup>2</sup> Paul Langan,<sup>1</sup> Andrzej Joachimiak,<sup>2,3,4</sup> Leighton Coates,<sup>1\*</sup> and Andrey Kovalevsky,<sup>1\*</sup>

**Supplementary Table 1.** DNA sequence for the codon-optimized gene of SARS-CoV-2 3CL M<sup>pro</sup>.

AGCGCTGTTCTGCAGTCTGGTTTCCGTAAAATGGCTTTCCCGTCTGGTAAAGTTGAA  
GGTTGTATGGTTCAGGTAACCTGCGGCACTACCACCCTGAACGGCCTGTGGCTGGAT  
GACGTTGTTTACTGCCC GCGTCATGTTATCTGTACTTCCGAAGATATGCTGAACCCG  
AACTACGAAGATCTGCTGATCCGTAAATCTAACCACA ACTTCCCTGGTTCAGGCAGGT  
AACGTT CAGCTGCGTGTTATCGGTC ACTCTATGCAGAACTGCGTTCGAAACTGAAA  
GTTGATACCGCTAACCCGAAAACCCCGAAATACAAATTCGTTTCGTATCCAGCCGGGT  
CAGACCTTCAGCGTTCGGCTTGCTATAACGGTTCCTCCGTCTGGTGTTCACAGTGCG  
CTATGCGTCCGAACTTCACTATTAAAGGTTCCCTCCTGAACGGTTCCTGTGGTTCGT  
TGGTTTCAACATTGATTACGATTGCGTTTCTTTCTGCTACATGCACCACATGGA ACTG  
CCGACTGGTGTTCACGCTGGCACCGATCTGGAAGGTA ACTTTTACGGTCCGTTTCGTT  
GACCGTCAGACCGCTCAGGCTGCTGGTACTGATACCACCATACCGTTAACGTTCTG  
GCTTGGCTGTACGCTGCTGTTATCAACGGTGATCGTTGGTTCCTGAACCGTTTCACCA  
CCACCCTGAACGATTTCAACCTGGTTGCGATGAAATACA ACTACGAACCGCTGACCC  
AGGATCACGTTGACATCCTGGGTCCGCTGTCTGCTCAGACCGGTATCGCTGTTCTGG  
ATATGTGCGCTTCTCTGAAAGAACTGCTGCAGAACGGTATGAACGGTCGTACCATCC  
TGGGTTCTGCTCTGCTGGAAGATGAATTTACCCCGTTCGATGTTGTTTCGTCAGTGCTC  
TGGTGTTACCTTCCAGGGTCCGCATCATCACCATCACCAT

**Supplementary Table 2.** Data reduction and refinement statistics for the room temperature structure of the 3CL M<sup>pro</sup> from SARS-CoV-2.

| <b>3CL M<sup>pro</sup>, PDB ID</b>                  |                          |
|-----------------------------------------------------|--------------------------|
| <b>6WQF</b>                                         |                          |
| <b>Data collection:</b>                             | <b>X-ray</b>             |
| Diffractionmeter                                    | Rigaku HighFlux Eiger 4M |
| Space group                                         | I2                       |
| Wavelength (Å)                                      | 1.54                     |
| Cell dimensions:                                    |                          |
| <i>a</i> , <i>b</i> , <i>c</i> (Å)                  | 45.07, 54.06, 113.61     |
| $\alpha$ , $\beta$ , $\gamma$ (°)                   | 90, 100.51, 90           |
| Resolution (Å)                                      | 27.92-2.30 (2.38-2.30)*  |
| No. reflections unique                              | 11514 (858)              |
| <i>R</i> <sub>merge</sub>                           | 0.110 (0.621)            |
| <i>R</i> <sub>pim</sub>                             | 0.065 (0.421)            |
| <i>CC</i> <sub>1/2</sub>                            | 0.993 (0.666)            |
| <i>I</i> / $\sigma$ <i>I</i>                        | 8.1 (1.9)                |
| Completeness (%)                                    | 95.4 (72.6)              |
| Redundancy                                          | 3.7 (2.7)                |
| <b>Refinement:</b>                                  | <b>X-ray</b>             |
| Resolution                                          | 27.92 – 2.30             |
| <i>R</i> <sub>work</sub> / <i>R</i> <sub>free</sub> | 0.180 / 0.230            |
| Ramachandran statistics                             |                          |
| Favored (%)                                         | 95.72                    |
| Allowed (%)                                         | 4.28                     |
| Outliers (%)                                        | 0                        |
| R.M.S. deviations                                   |                          |
| Bond lengths (Å)                                    | 0.002                    |
| Bond angles (°)                                     | 0.444                    |
| All atom clashscore                                 | 0.85                     |
| <i>B</i> -factors (Å <sup>2</sup> )                 |                          |
| Protein (overall)                                   | 37.1                     |
| Protein (main chain)                                | 35.4                     |
| Protein (side chain)                                | 38.9                     |
| Water                                               | 32.6                     |

\* Values in parentheses are for highest-resolution shell. Data were collected from one crystal.

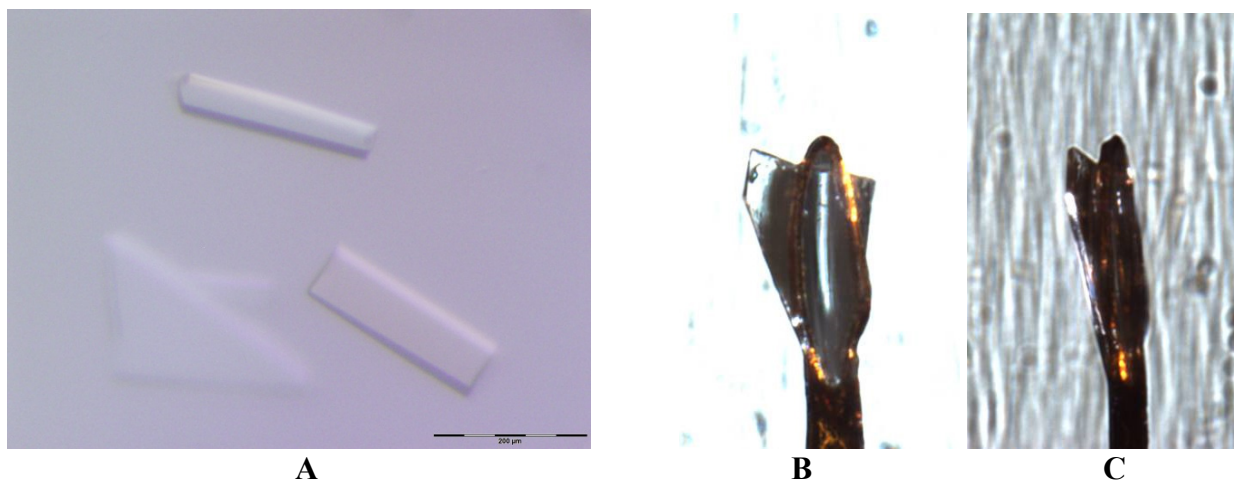

**Supplementary Figure 1.** (A) Crystals of 3CL M<sup>pro</sup> grown using the microseeding technique; (B, C) Crystal mounted on a loop used for the room-temperature X-ray data collection.

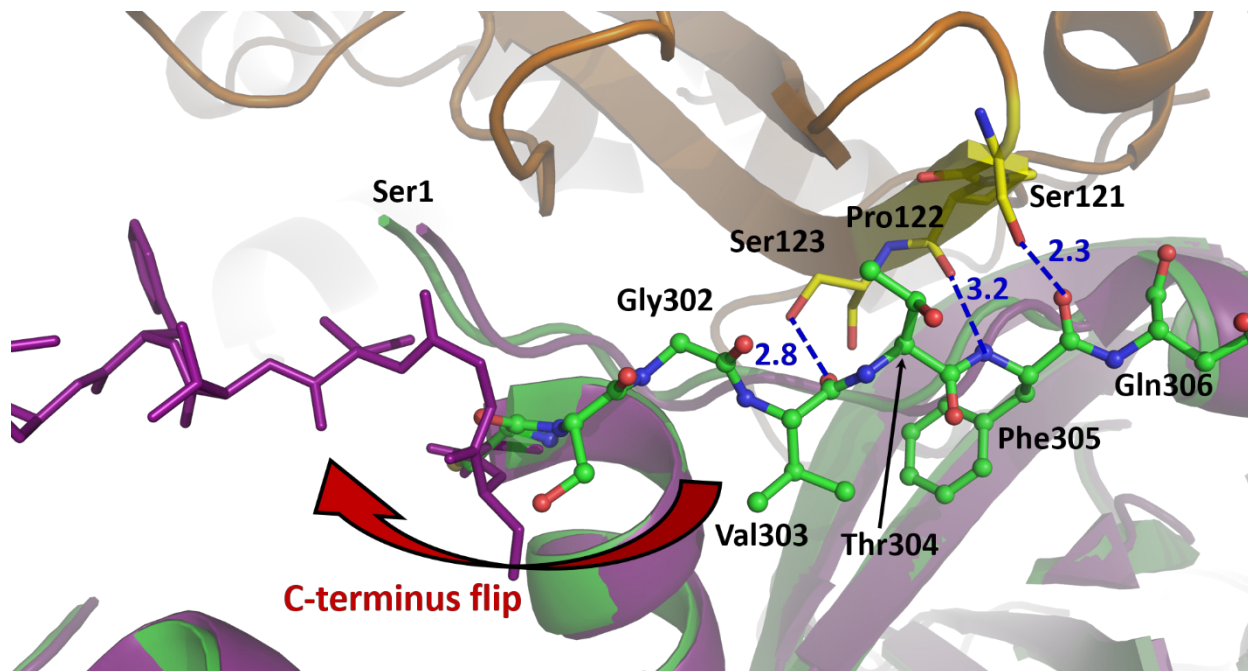

**Supplementary Figure 2.** Superposition of the room temperature ligand-free structure of 3CL M<sup>Pro</sup> (green carbon atoms) in complex with inhibitor N3 (deep purple, PDB ID 6LU7) from SARS-CoV-2. The C-terminal tail flips 180° upon the inhibitor binding (shown by the curved red arrow).

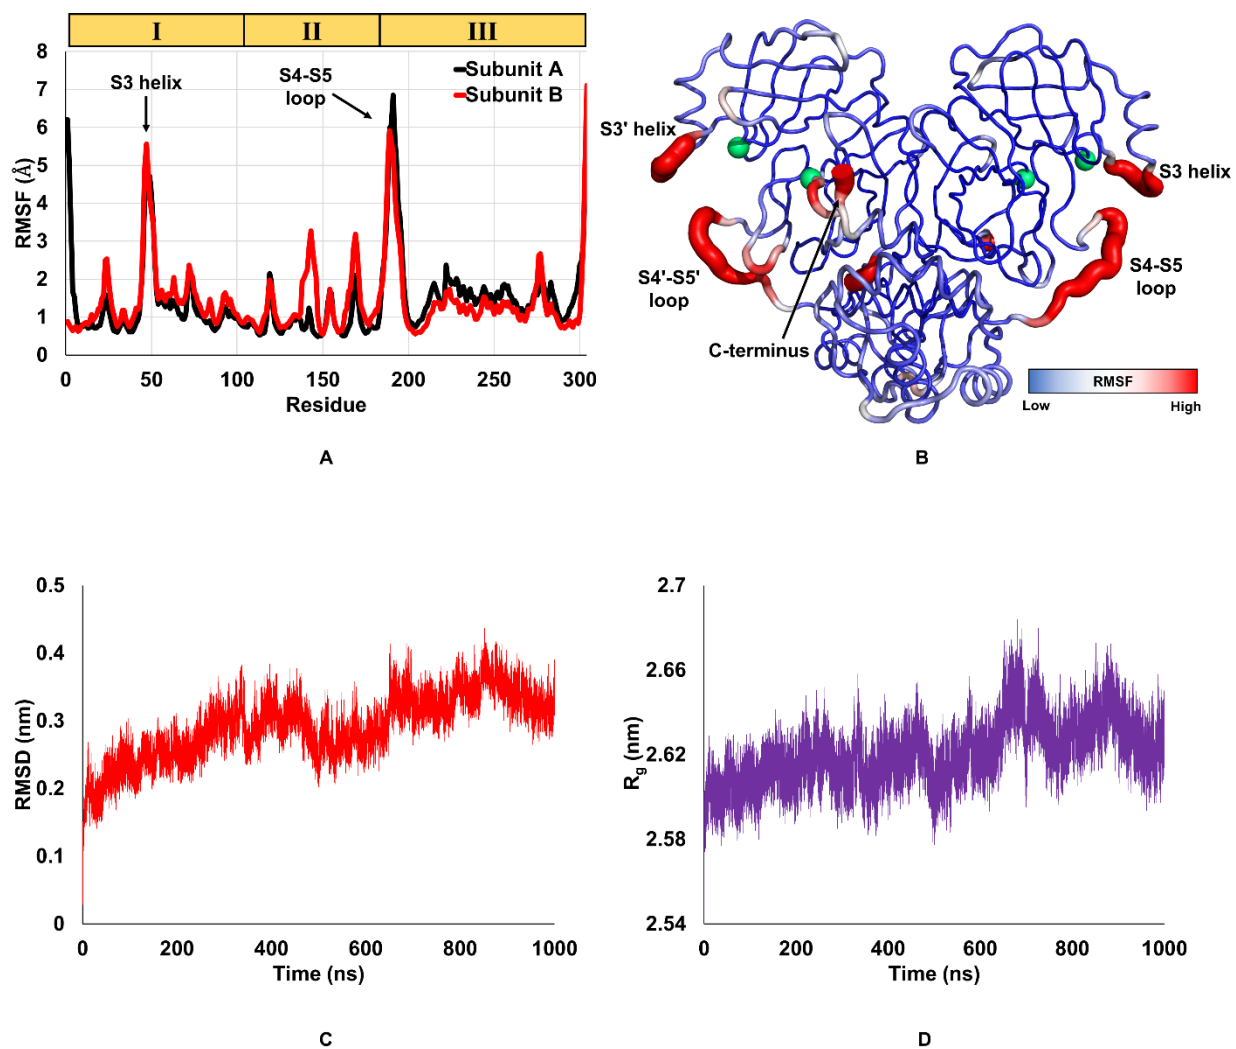

**Supplementary Figure 3.** Root Mean Square Fluctuation (RMSF) analysis from a 1 μs MD simulation of an apo 3CL M<sup>pro</sup> dimer. **(A)** Protein backbone RMSF by residue for Subunits A and B. **(B)** Cartoon-putty representation of 3CL M<sup>pro</sup> colored by protein backbone RMSF with Cα of His41/41' and Cys145/145' shown as green spheres. **(C)** RMSD of backbone atoms relative to the equilibrated structure. **(D)** Radius of gyration ( $R_g = 26.2 \pm 0.15 \text{ \AA}$ ) of 3CL M<sup>pro</sup> dimer.
